# Supplementary material for: A general concept for white light emission formation from two complementary colored luminescent dyes
Source: Royal Society of Chemistry journal article supplement (doi:10.1039/c8qm00599k), 2019-01-01
Supplement: c8qm00599k1.pdf [file c8qm00599k1.pdf]

## Supporting information

### 1. $^1\text{H}$ NMR spectra of TFBP

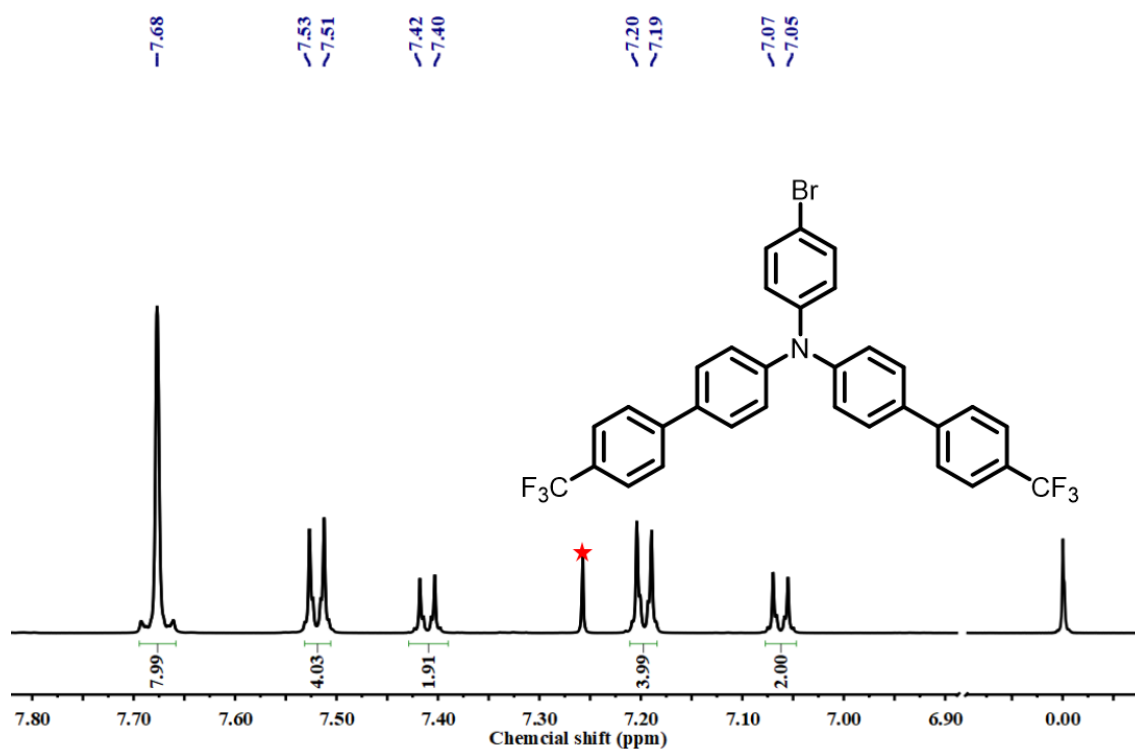

Fig. S1  $^1\text{H}$  NMR spectra of TFBP in  $\text{CDCl}_3$  at room temperature.

### 2. $^{13}\text{C}$ NMR spectra of TFBP

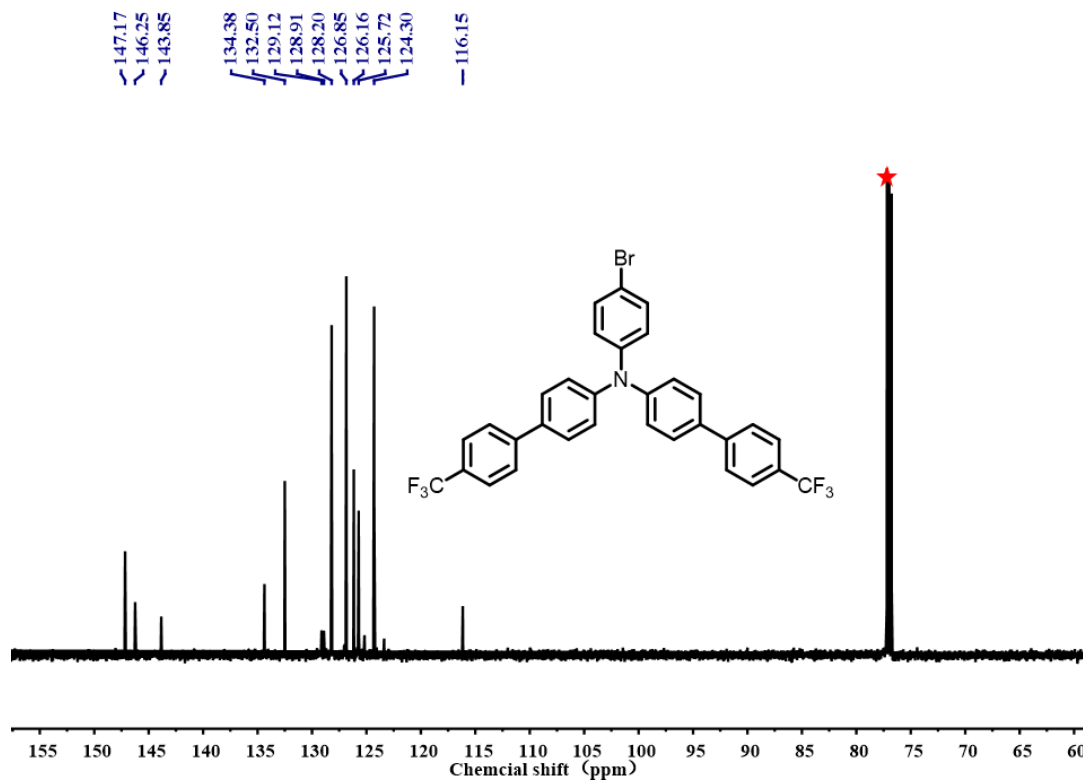

Fig. S2  $^{13}\text{C}$  NMR spectra of TFBP in  $\text{CDCl}_3$  at room temperature.

### 3. $^1\text{H}$ NMR spectra of TFBP-VB

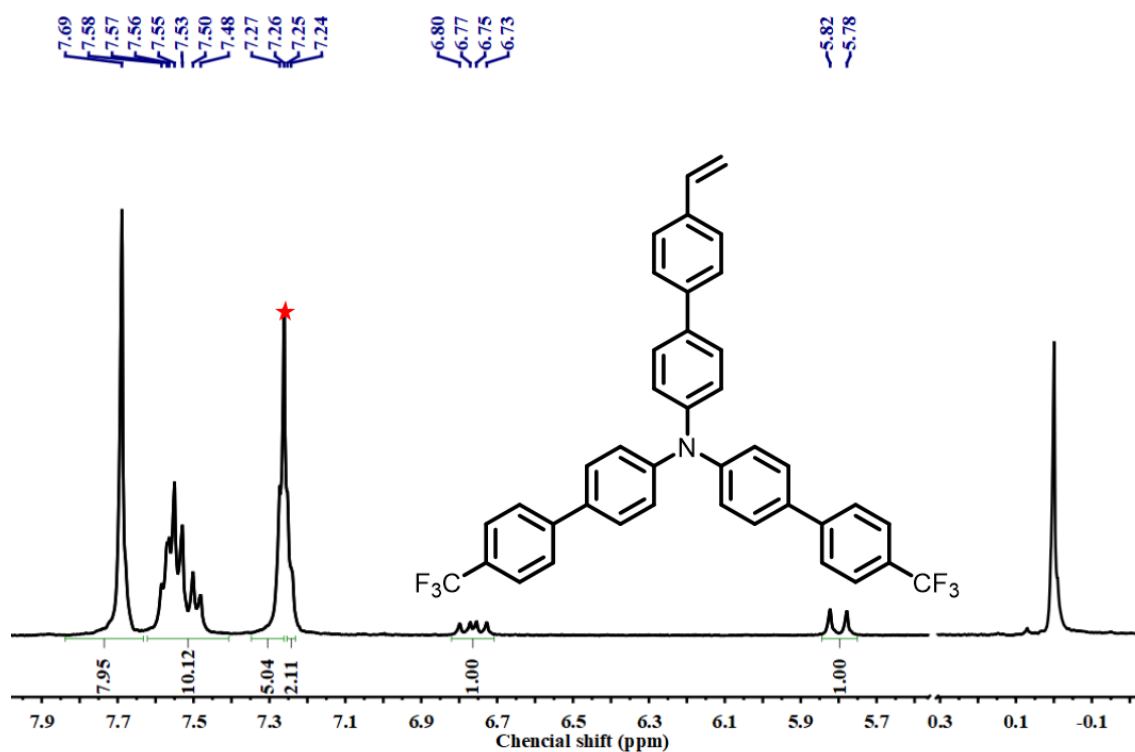

Fig. S3  $^1\text{H}$  NMR spectra of TFBP-VB in  $\text{CDCl}_3$  at room temperature.

### 4. $^{13}\text{C}$ NMR spectra of TFBP-VB

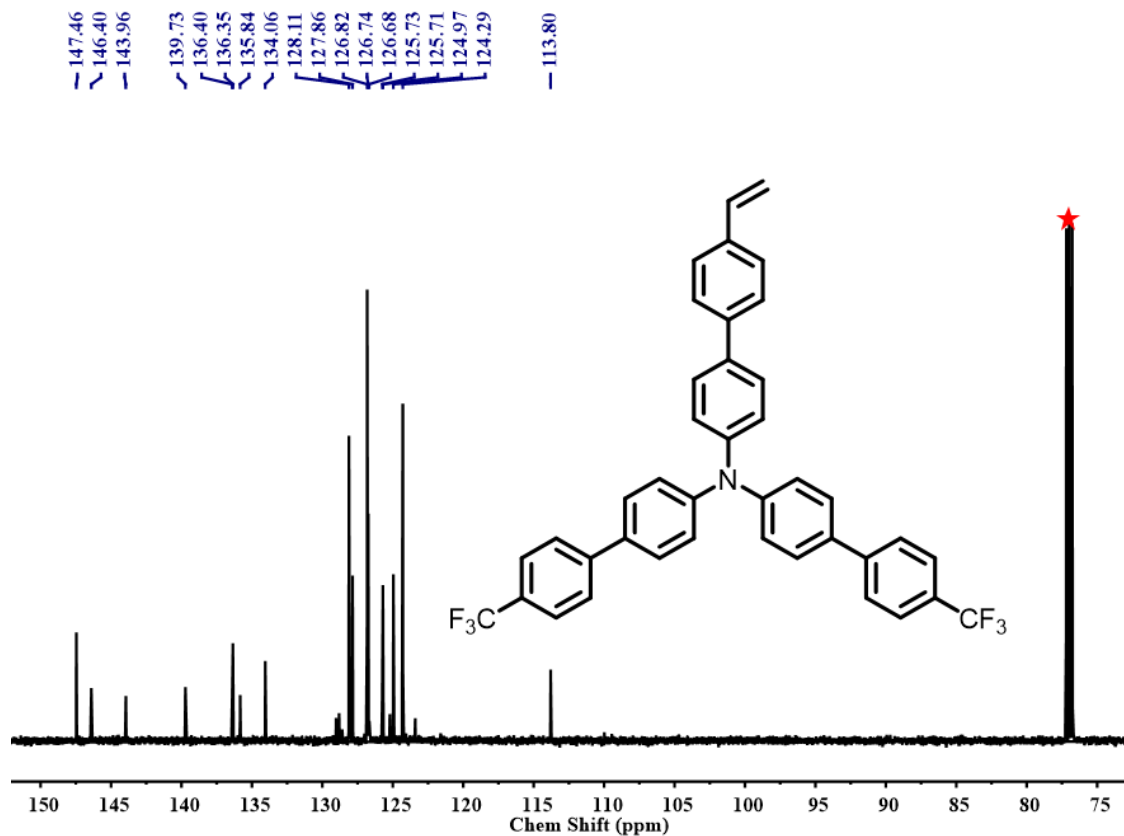

Fig. S4  $^{13}\text{C}$  NMR spectra of TFBP-VB in  $\text{CDCl}_3$  at room temperature.

5.  $^1\text{H}$  NMR spectra of TPA-Py

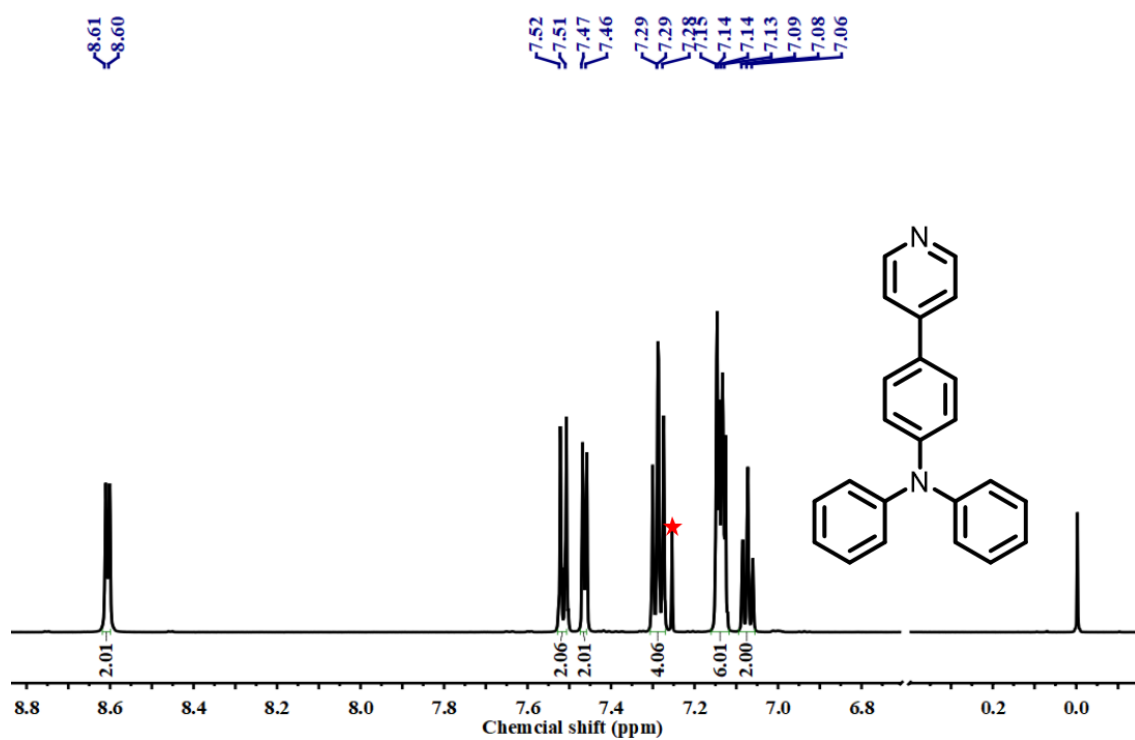

Fig. S5  $^1\text{H}$  NMR spectra of TPA-Py in  $\text{CDCl}_3$  at room temperature.

6.  $^{13}\text{C}$  NMR spectra of TPA-Py

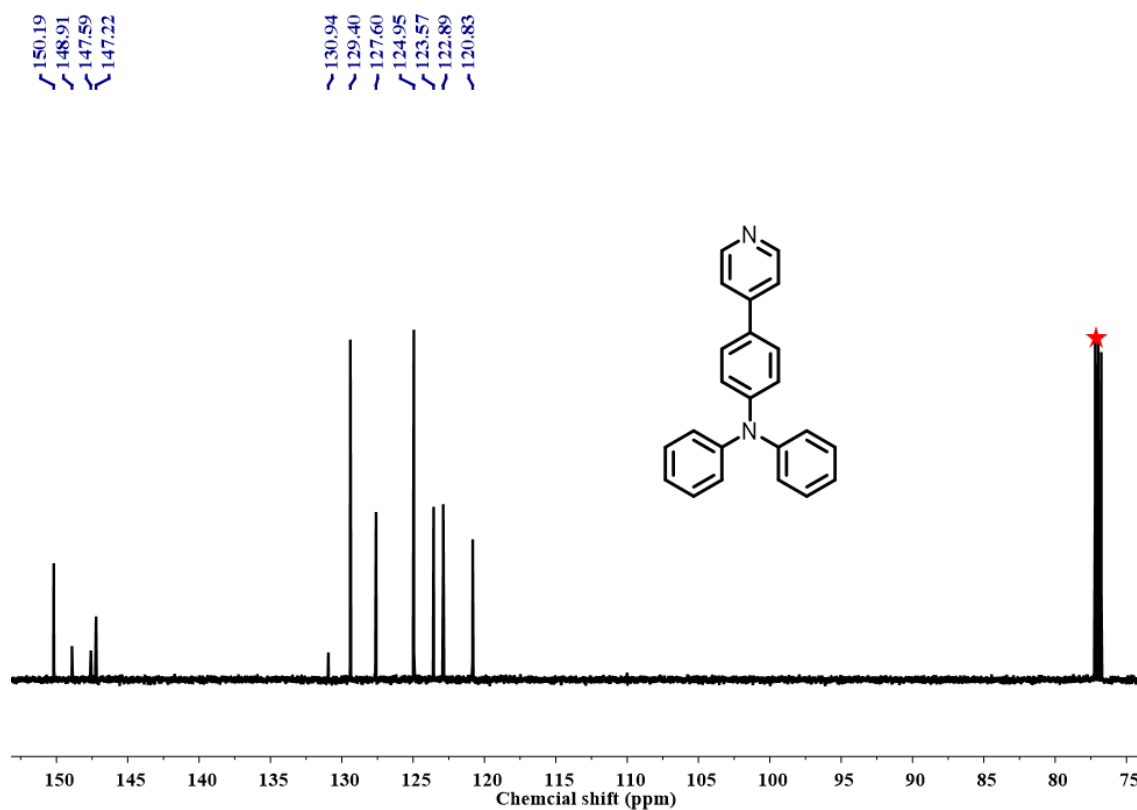

Fig. S6  $^{13}\text{C}$  NMR spectra of TPA-Py in  $\text{CDCl}_3$  at room temperature.

## 7. $^1\text{H}$ NMR spectra of TPA-Py-CVB

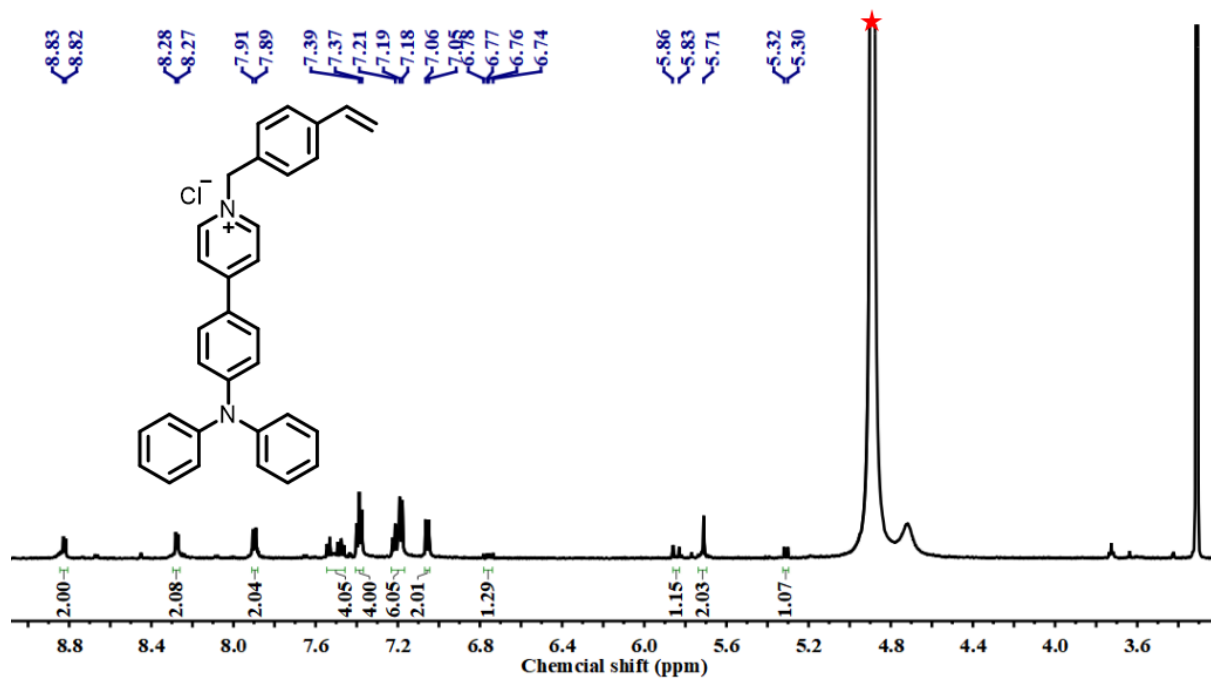

Fig. S7  $^1\text{H}$  NMR spectra of TPA-Py-CVB in  $\text{CD}_3\text{OD}$  at room temperature.

## 8. $^{13}\text{C}$ NMR spectra of TPA-Py-CVB

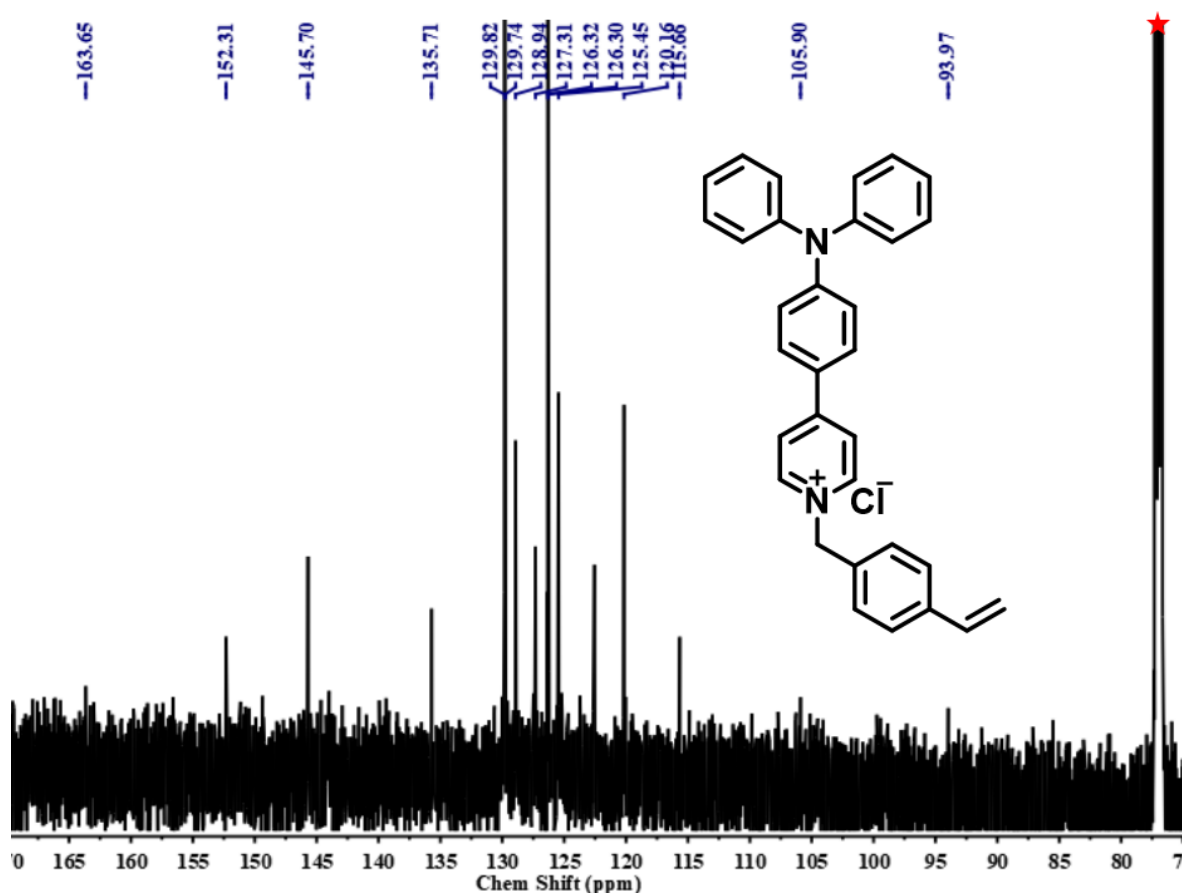

Fig. S8  $^{13}\text{C}$  NMR spectra of TPA-Py-CVB in  $\text{CD}_3\text{Cl}$  at room temperature.

9.  $^1\text{H}$  NMR spectra of TPA-VPy

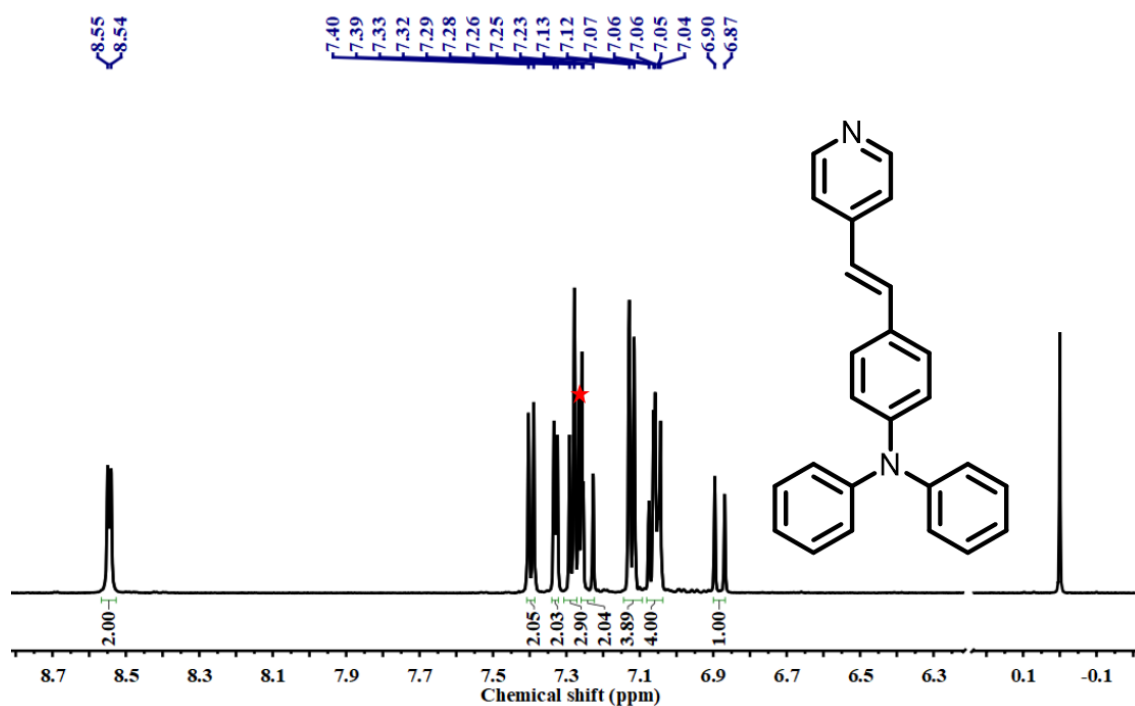

Fig. S9  $^1\text{H}$  NMR spectra of TPA-VPy in  $\text{CDCl}_3$  at room temperature.

10.  $^{13}\text{C}$  NMR spectra of TPA-VPy

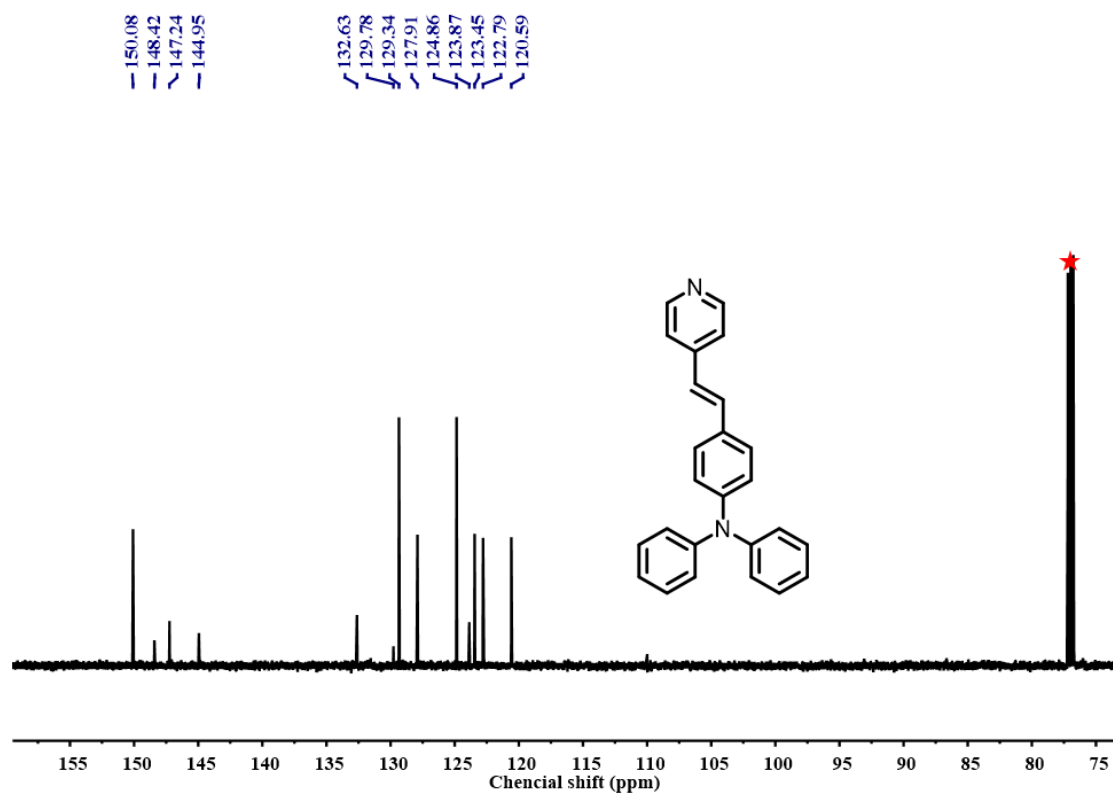

Fig. S10  $^{13}\text{C}$  NMR spectra of TPA-VPy in  $\text{CDCl}_3$  at room temperature.

# 11. $^1\text{H}$ NMR spectra of TPA-VPy-CVB

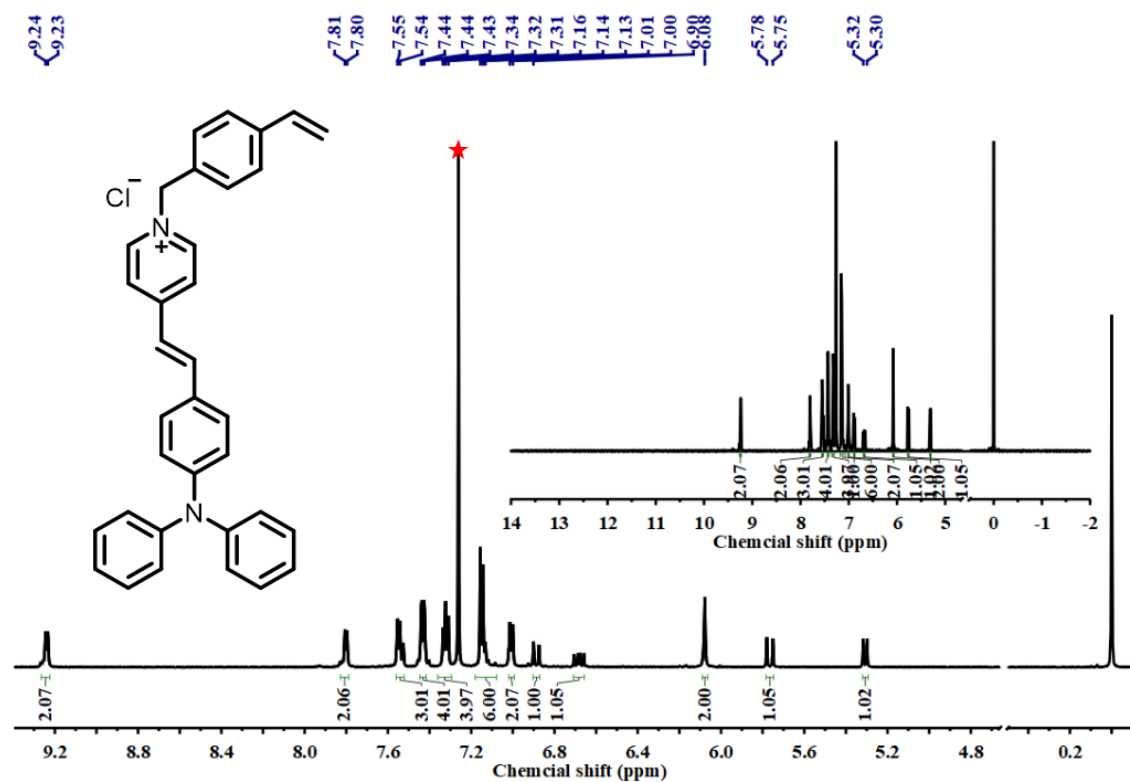

Fig. S11  $^1\text{H}$  NMR spectra of TPA-VPy-CVB in  $\text{CDCl}_3$  at room temperature.

# 12. $^{13}\text{C}$ NMR spectra of TPA-VPy-CVB

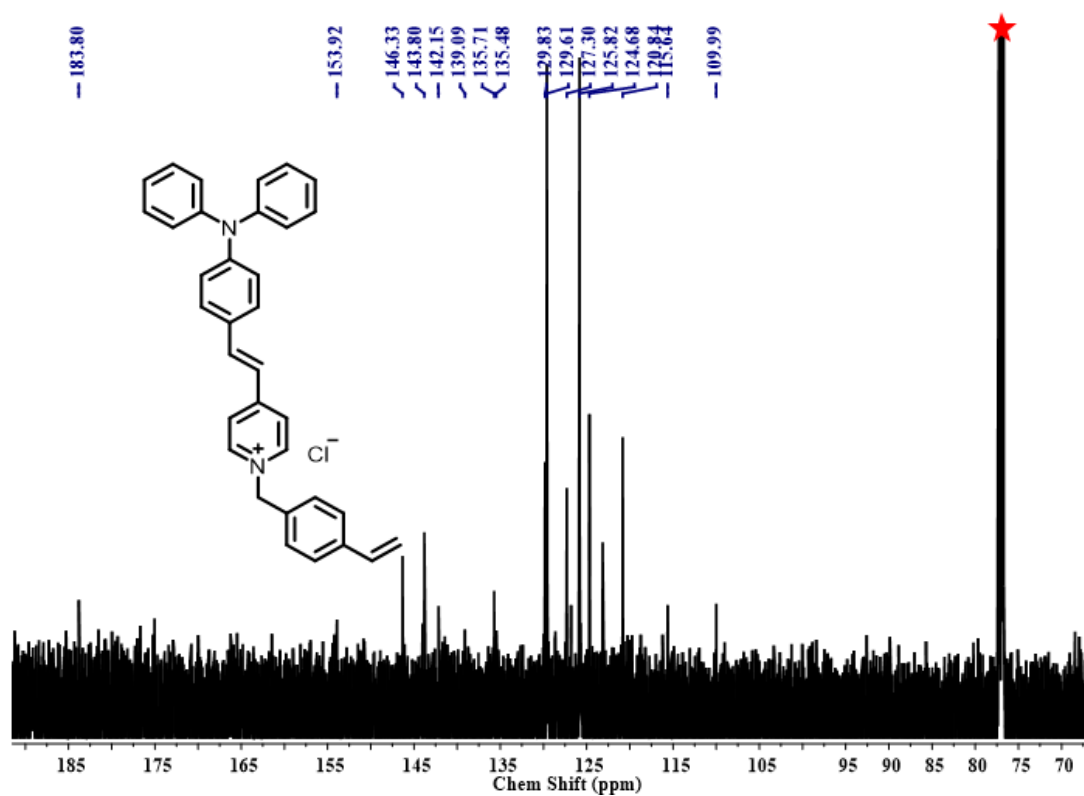

Fig. S12  $^{13}\text{C}$  NMR spectra of TPA-VPy-CVB in  $\text{CDCl}_3$  at room temperature.

13. Optimized molecular orbital amplitude plots of the HOMO and LUMO energy levels of TPA-Py-CVB, TPA-VPy-CVB.<sup>1</sup>

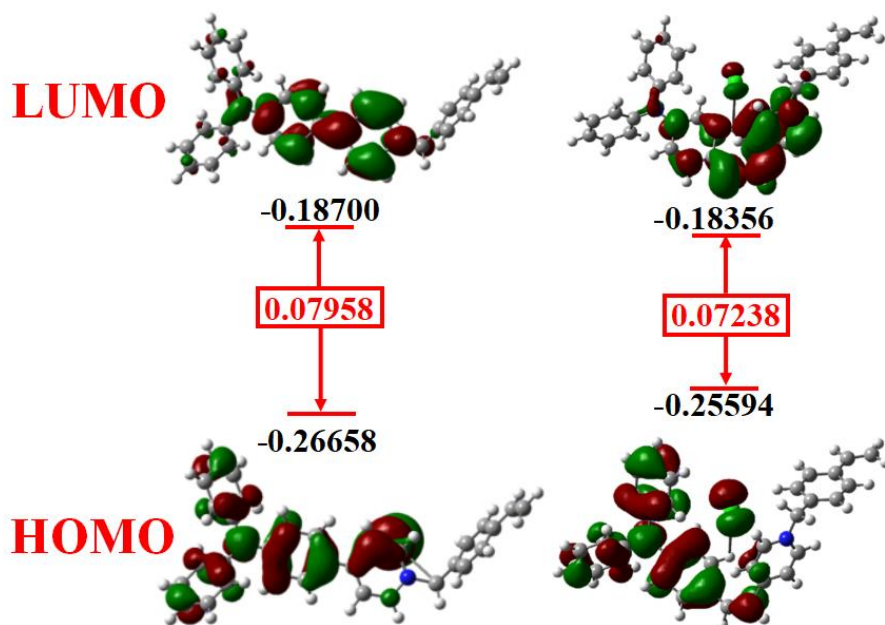

Fig. S13 Optimized molecular orbital amplitude plots of the HOMO and LUMO energy levels of TPA-Py-CVB, TPA-VPy-CVB.

14. Synthetic Routes of P-Orange&Blue

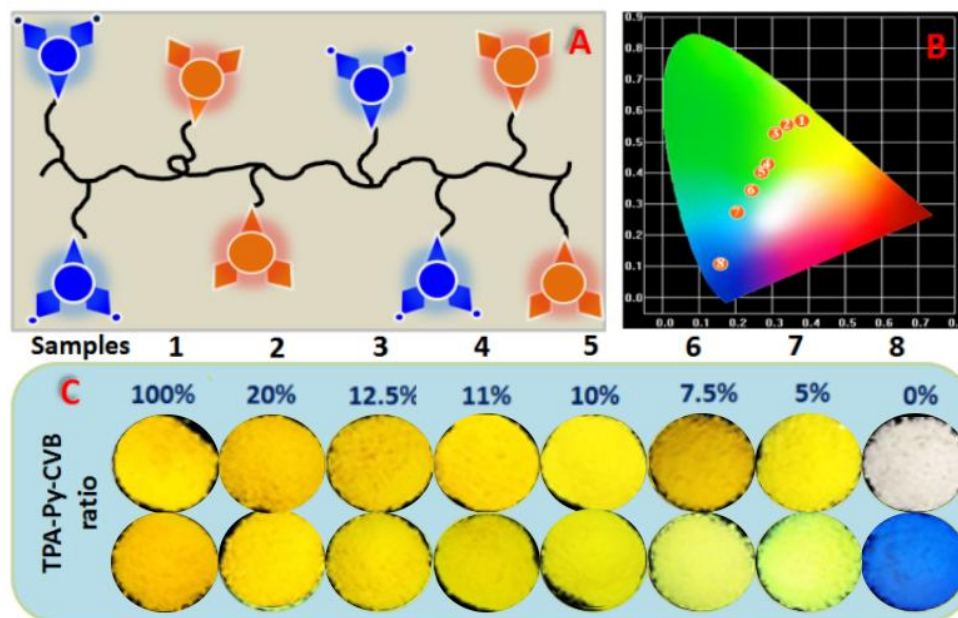

Fig. S14 (a)Synthetic Routes of P-Orange&Blue, The CIE Chromaticity Diagram(c) and photographs(b) of P-Orange&Blue in solid state.

<sup>1</sup> Theoretical calculations using the OPT/FREQ/B3LYP/6-31G\* level in the Gaussian 09 program were carried out to characterize the three-dimensional structures and the frontier molecular orbital energy levels of TPA-Py-CVB, TPA-VPy-CVB.

## 15. The theoretical molar ratios of the fluorophores in the polymers

**Table S1** The molar ratios of the fluorophores in the polymers

| Polymers        | molar ratios of the fluorophores (Blue/Orange) | Polymers     | molar ratios of the fluorophores (Blue/Red) |
|-----------------|------------------------------------------------|--------------|---------------------------------------------|
| P-Orange        | 1                                              | P-Red        | 1                                           |
| P-Orange&Blue-2 | 3:1                                            | P-Red&Blue-2 | 2:1                                         |
| P-Orange&Blue-3 | 7:1                                            | P-Red&Blue-3 | 2.5:1                                       |
| P-Orange&Blue-4 | 8:1                                            | P-Red&Blue-4 | 3:1                                         |
| P-Orange&Blue-5 | 9:1                                            | P-Red&Blue-5 | 4:1                                         |
| P-Orange&Blue-6 | 12:1                                           | P-Red&Blue-6 | 5:1                                         |
| P-Orange&Blue-7 | 19:1                                           | P-Red&Blue-7 | 6:1                                         |
| P-Blue          | 1                                              | P-Blue       | 1                                           |

## 16. $^1\text{H}$ NMR spectra of polymers

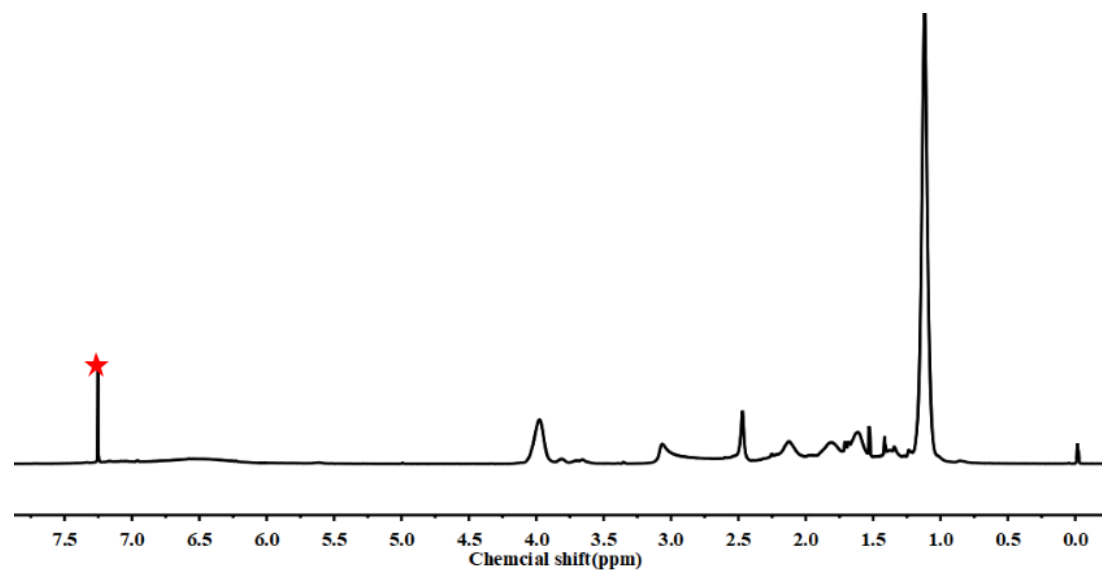

**Fig. S15**  $^1\text{H}$  NMR spectra of P-Orange in  $\text{CDCl}_3$  at room temperature.



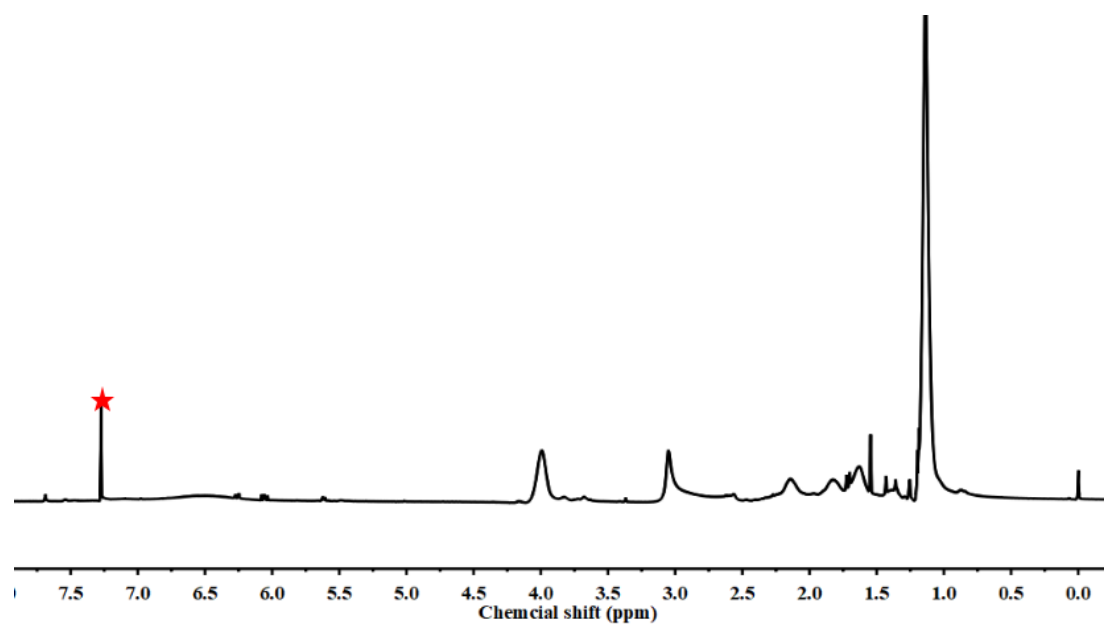

**Fig. S16**  $^1\text{H}$  NMR spectra of P-Blue in  $\text{CDCl}_3$  at room temperature.

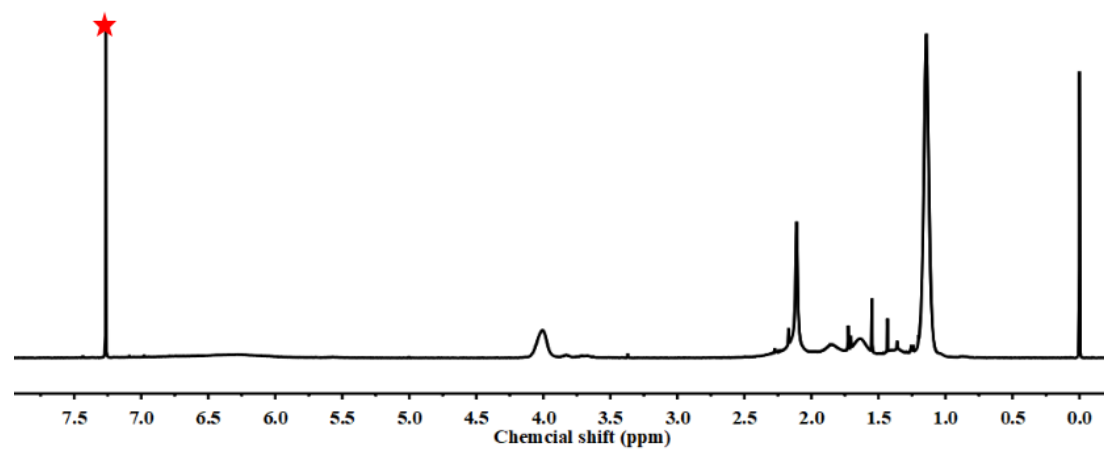

**Fig. S17**  $^1\text{H}$  NMR spectra of P-Orange&Blue-3 in  $\text{CDCl}_3$  at room temperature.

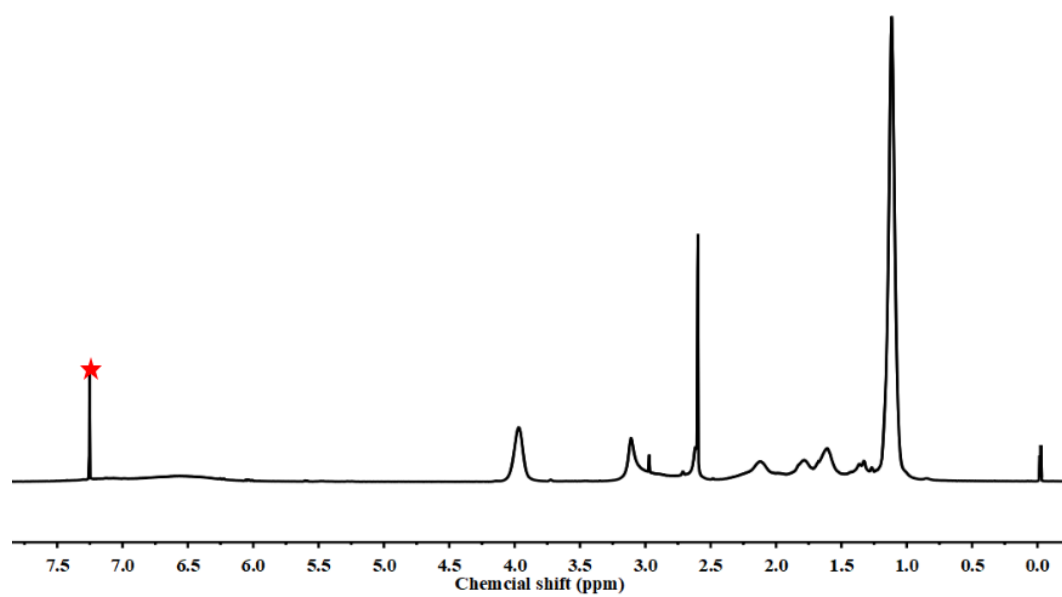

**Fig. S18**  $^1\text{H}$  NMR spectra of P-Red in  $\text{CDCl}_3$  at room temperature.

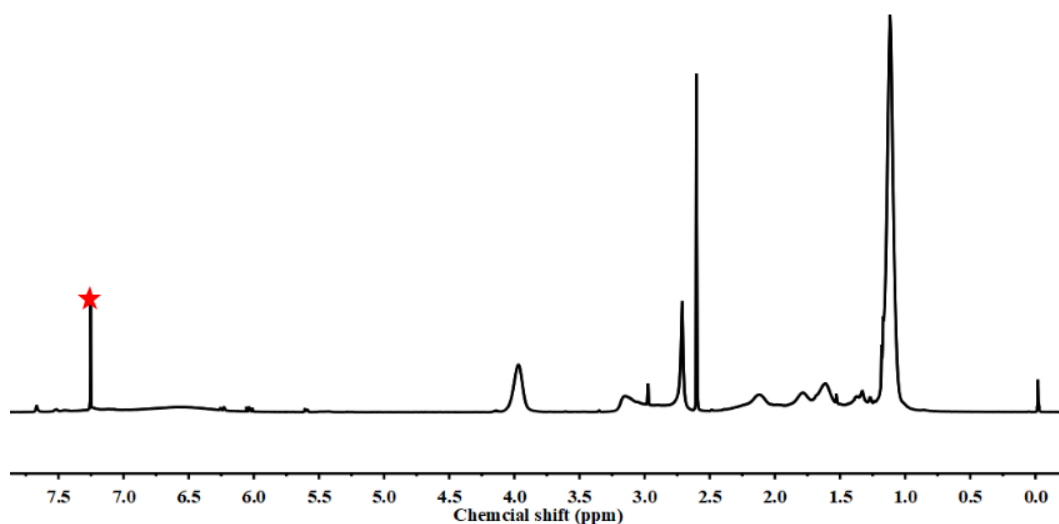

**Fig. S19**  $^1\text{H}$  NMR spectra of P-Red&Blue-3 in  $\text{CDCl}_3$  at room temperature.

### 17. Histogram of the integral area of fluorescence spectrum

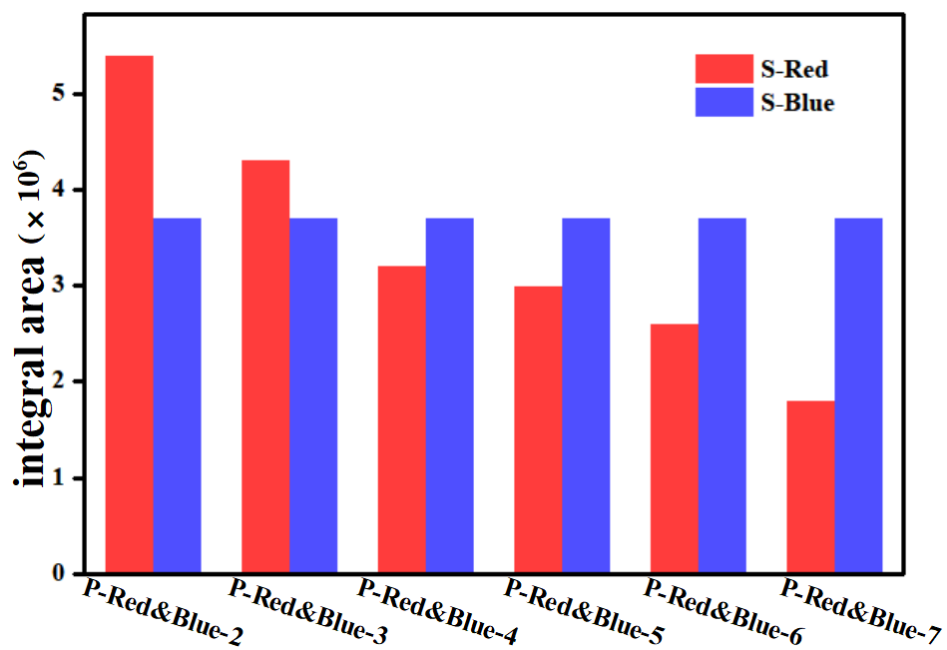

**Fig. S20** Histogram of the integral area of fluorescence spectrum of P-Red&Blue2-7.

## 18. FTIR spectrum of compounds and polymers

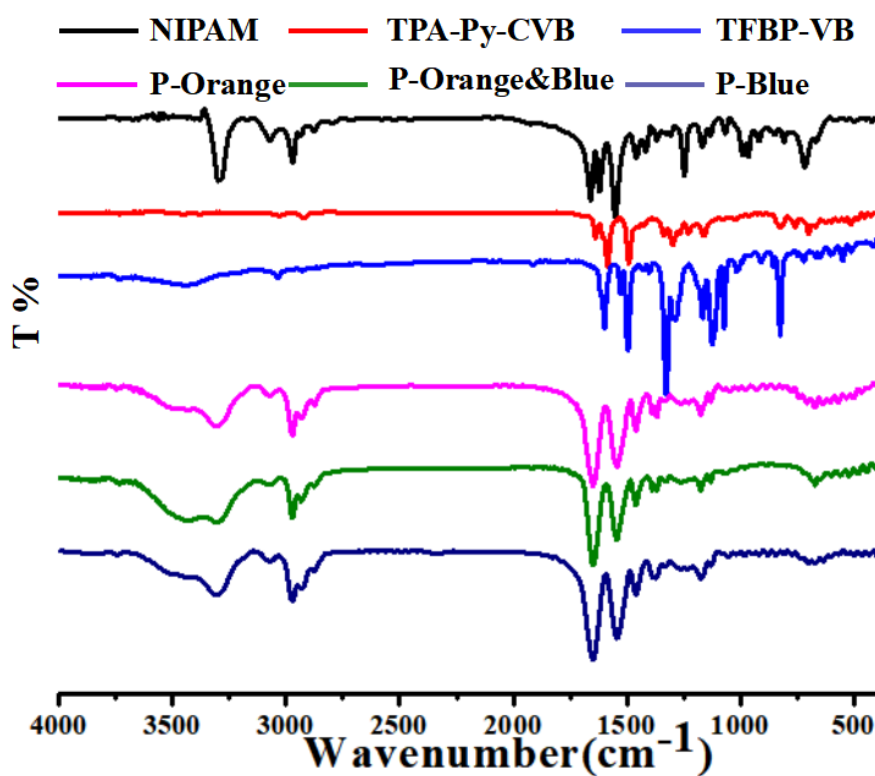

**Fig. S21** FTIR spectrum<sup>2</sup> of NIPAM, TPA-Py-CVB, TFBP-VB, P-Orange, P-Orange&Blue-3, P-Blue.

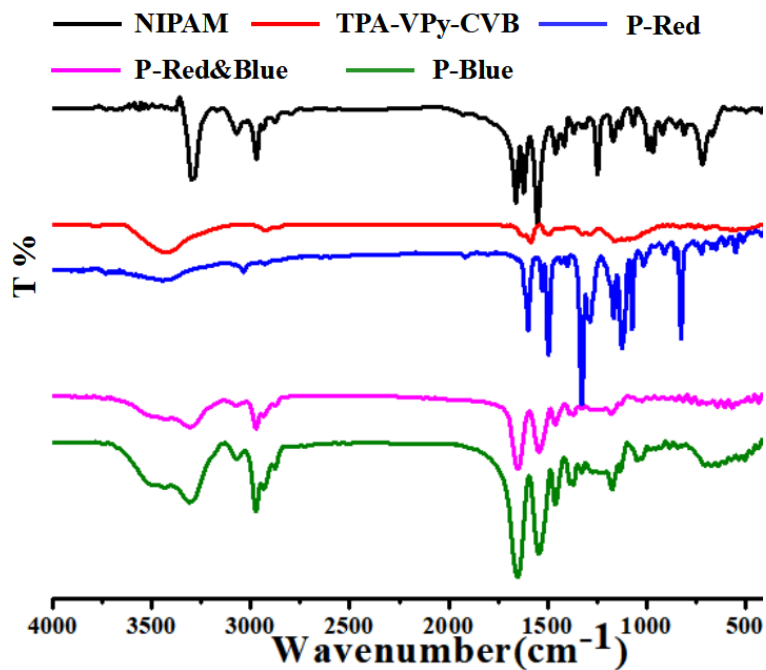

**Fig. S22** FTIR spectrum of NIPAM, TPA-VPy-CVB, TFBP-VB, P-Red, P-Blue.

<sup>2</sup> Fourier transform infrared (FT-IR) spectra were recorded on a DIGIL FTS3000 spectrophotometer using KBr tablets.

## 19. The GPC, LCST , Time-resolved fluorescence and Particle Size data of polymers

**Table 1.** The GPC<sup>3</sup>, LCST<sup>4</sup>, Time-resolved fluorescence<sup>5</sup> and Particle Size<sup>6</sup> data of polymers

| Polymer         | Mn                  | Mw/Mn | LCST  | $\tau$  | Particle size |
|-----------------|---------------------|-------|-------|---------|---------------|
| P-Orange        | $1.104 \times 10^5$ | 3.141 | 32 °C | 4.81 ns | 343 nm        |
| P-Red           | $1.939 \times 10^3$ | 1.567 | 34 °C | 3.42 ns | 1200 nm       |
| P-Blue          | $1.515 \times 10^4$ | 1.422 | 38 °C | 1.75 ns | 250 nm        |
| P-Orange&Blue-3 | $5.794 \times 10^5$ | 1.154 | 31 °C | 5.31 ns | 1060 nm       |
| P-Red&Blue-3    | $8.296 \times 10^5$ | 1.368 | 33 °C | 3.99 ns | 309 nm        |

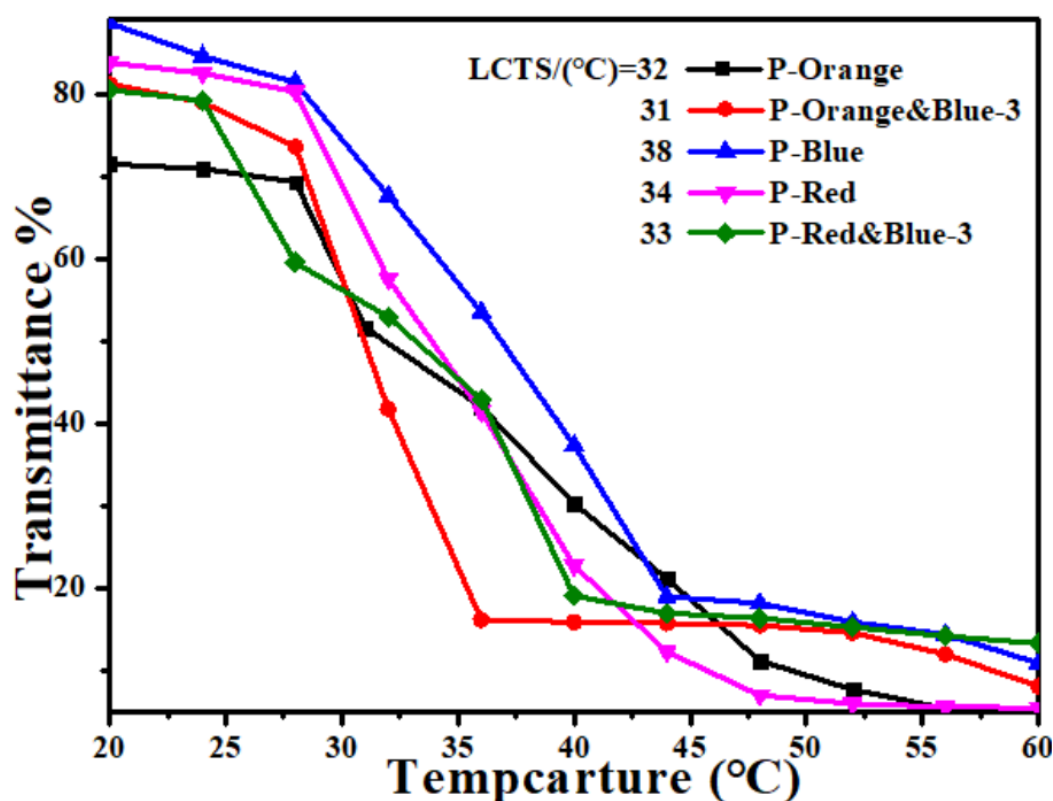

**Fig. S23** Transmittance temperature for polymers in aqueous solution.

<sup>3</sup> The number- and weight-averaged molecular weights (Mn, Mw) were determined by gel permeation chromatography (GPC).

<sup>4</sup> Turbidity measurements were performed on Z-2000 spectrophotometer equipped in quartz cuvettes of 10 mm path length at a wavelength of 500 nm. In all cases, a polymer concentration of 0.1 mg/mL was employed. Heating rates were 1 °C/min for all measurements. For all clear solutions, the baseline was corrected to zero absorbance, A. Transmittance,  $T = 10^{-A}$ , was plotted against temperature, and cloud points were determined at 50% transmittance. The maximum temperature was setted as 60 °C for all solutions.

<sup>5</sup> Time-resolved fluorescence measurements were carried out using a C11367-11 QuantaTaurus-Tau system. The time resolution was 20 ps. The laser energy level for excitation is 2 mW. Decay of the fluorescence intensity (I) with time (t) was fitted by a double-exponential function as shown in Equation (1):

$$I = A_1 e^{-t/\tau_1} + A_2 e^{-t/\tau_2} \quad (1)$$

in which  $\tau_1$  and  $\tau_2$  are the lifetimes of the shorter- and longer-lived species, respectively, and  $A_1$  and  $A_2$  are their respective amplitudes. The weighed mean lifetime ( $\langle \tau \rangle$ ) was calculated according to Equation (2):

$$\langle \tau \rangle = \frac{A_1 \tau_1 + A_2 \tau_2}{A_1 + A_2} \quad (2)$$

<sup>6</sup> Particle size measurements process were performed on a Zetasizer Nano ZS dynamic light scattering (DLS) system. This system determined the particle size distribution of particles in solution, with measurement capability from 0.3 nm to 10  $\mu$ m. All the samples were tested in aqueous solution.

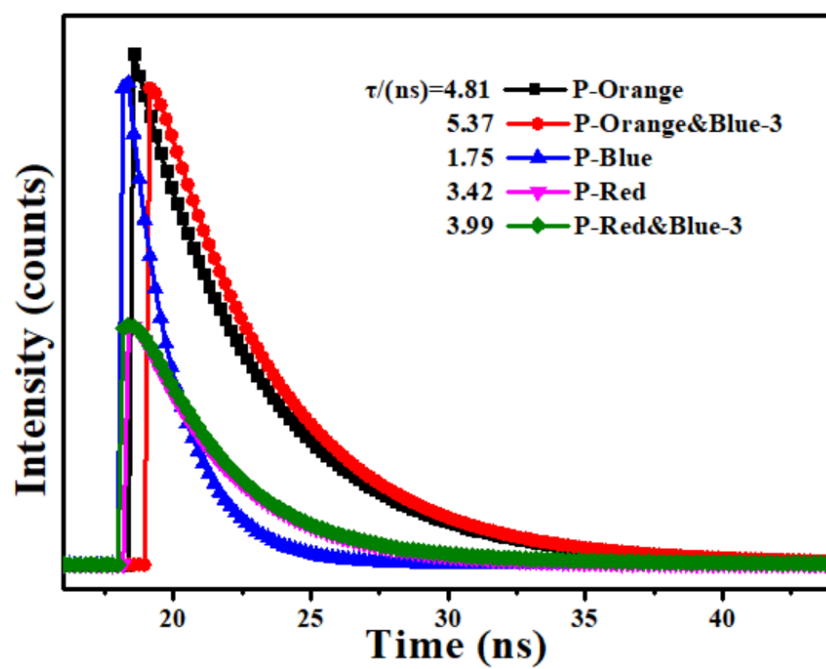

Fig. S24 Time-resolved fluorescence decays of P-Orange, P-Orange-Blue, P-Blue, P-Red, P-Red&Blue.

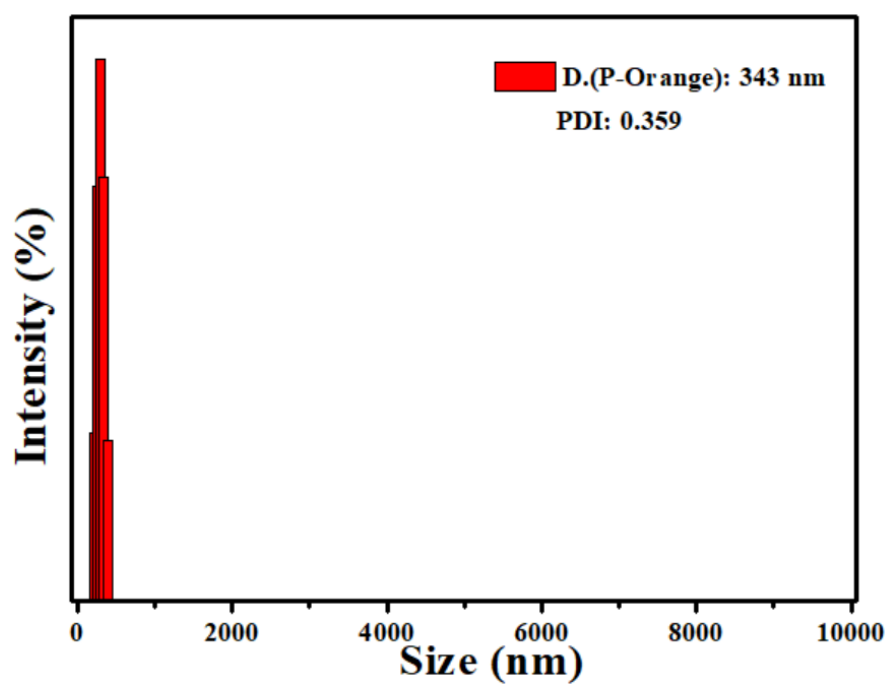

Fig. S25 The particle size distributions of P-Orange.

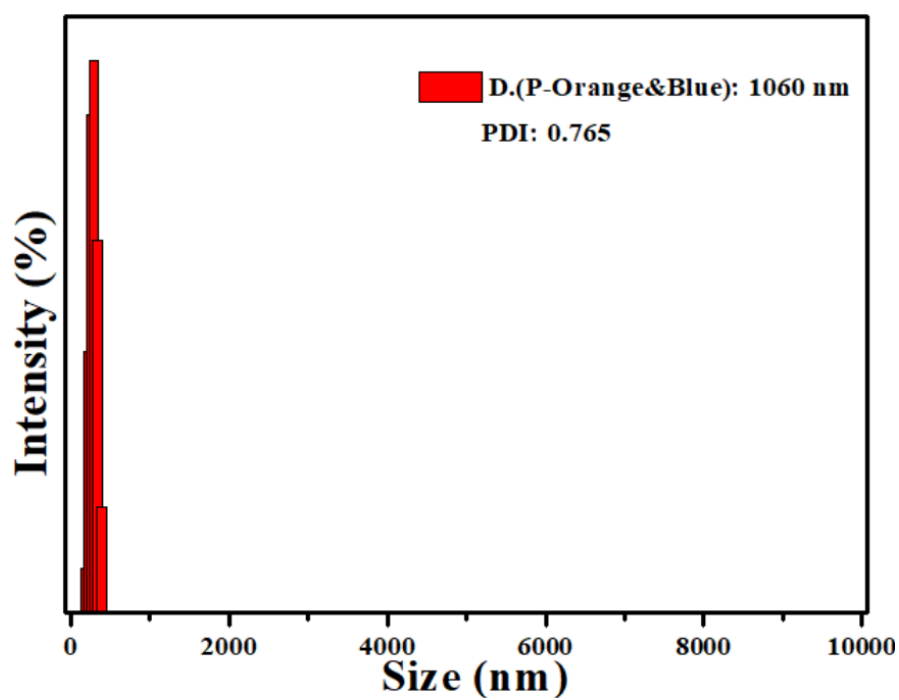

Fig. S26 The particle size distributions of P-Orange&Blue-3.

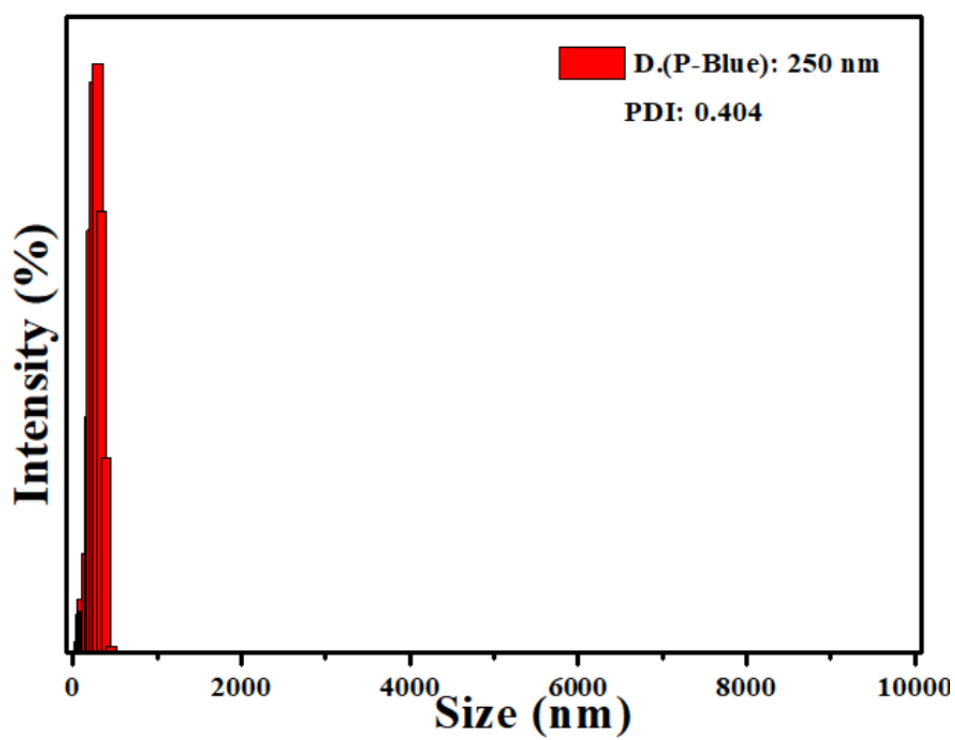

Fig. S27 The particle size distributions of P-Blue.

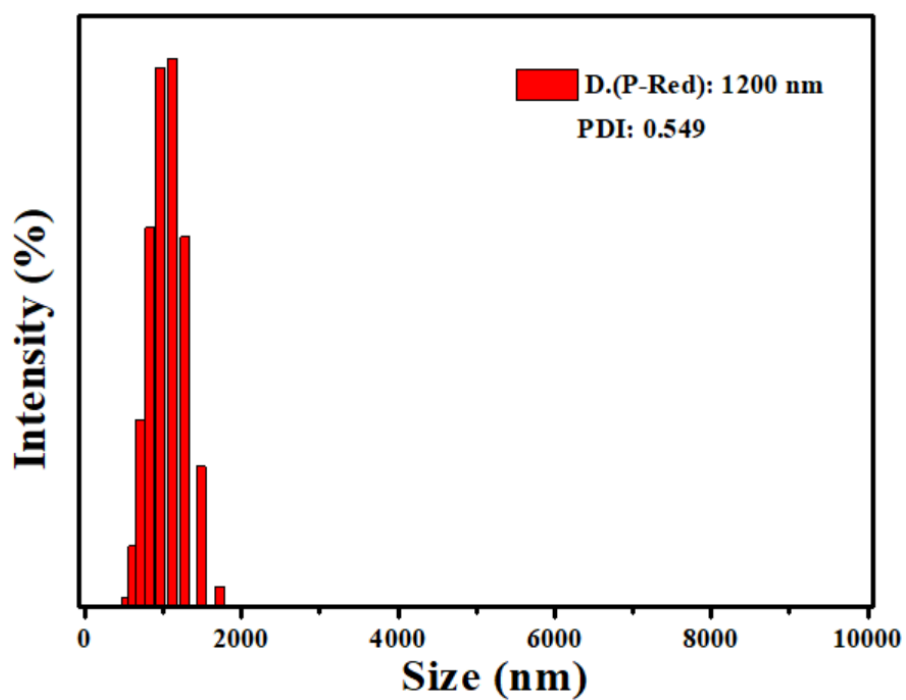

Fig. S28 The particle size distributions of P-Red.

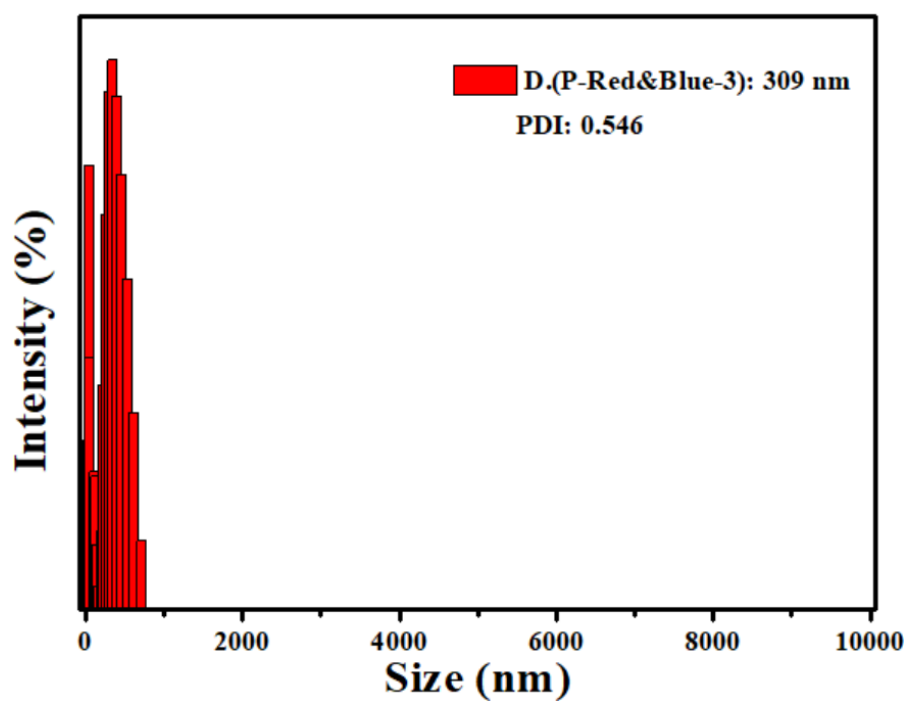

Fig. S29 The particle size distributions of P-Red&Blue-3.

## 20. The Fluorescence Spectra, photographs and SEM<sup>7</sup> images of hydrogels

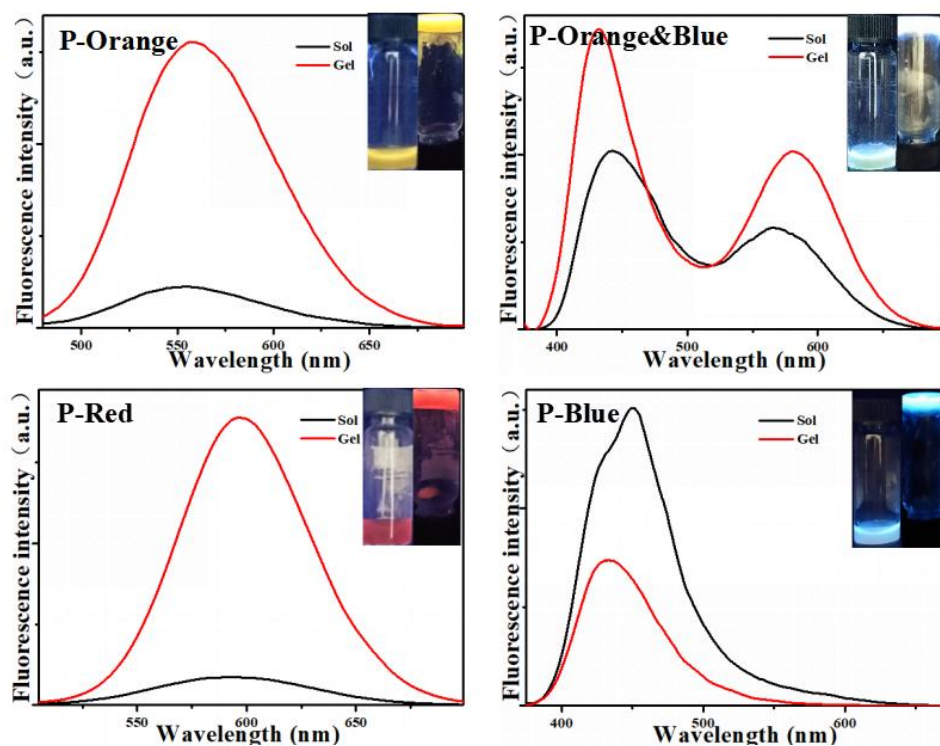

**Fig. S30** The fluorescence spectra and photographs of P-Orange, P-Orange&Blue-3, P-Blue, P-Red in aqueous solution in the sol and gel states.

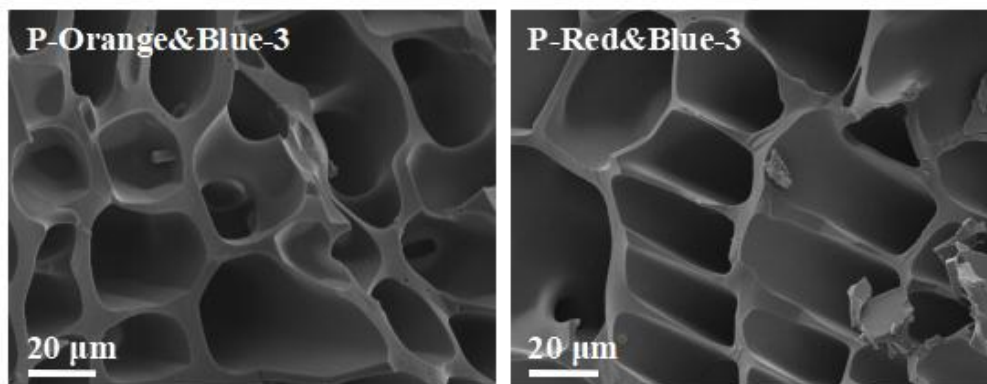

**Fig. S31** SEM images of P-Orange&Blue-3 and P-Red&Blue-3 in the gel states.

<sup>7</sup> The morphology of xerogels of polymers were observed by scanning electron microscopy (SEM, Zeiss Ultra Plus), and the xerogel was produced by solvent evaporation by LGJ-10E multi-manifold freeze-drying machine. All of the samples were prepared according to the standard methods.



## 21. The UV and Fluorescence Spectra of P-Orange&Blue

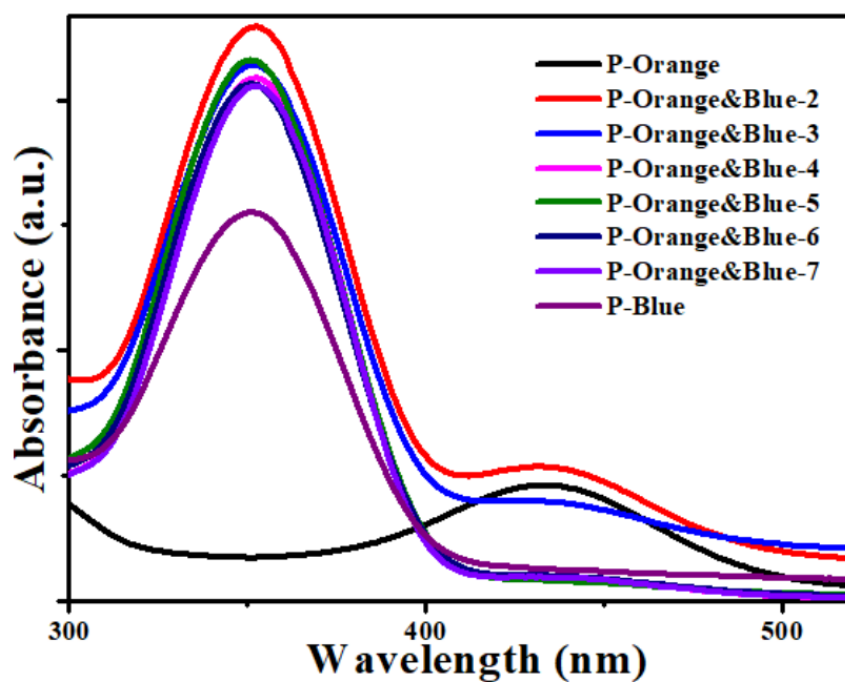

Fig. S32 The UV spectra of P-Orange&Blue in aqueous solution.

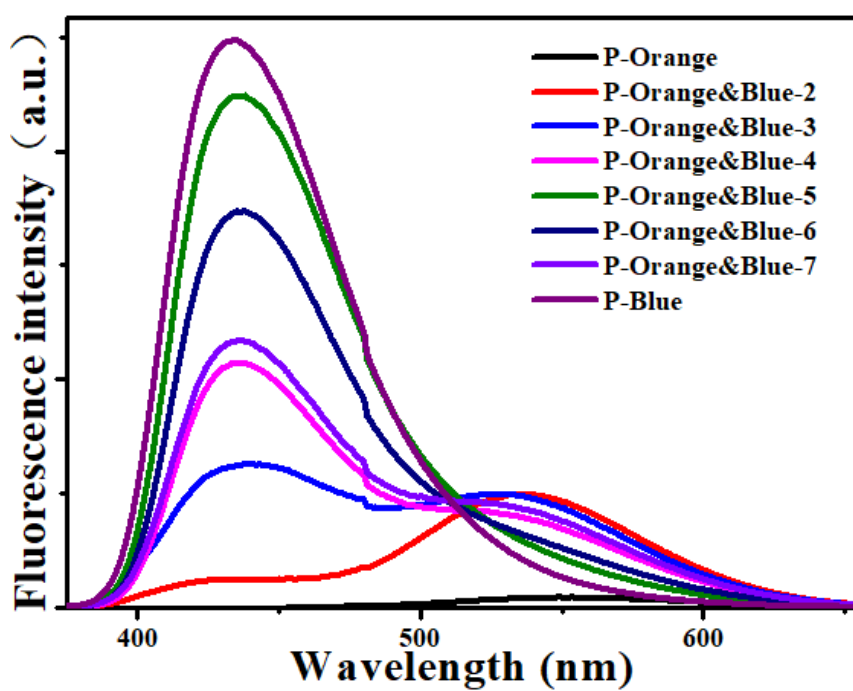

Fig. S33 The fluorescence spectra of P-Orange&Blue in aqueous solution.

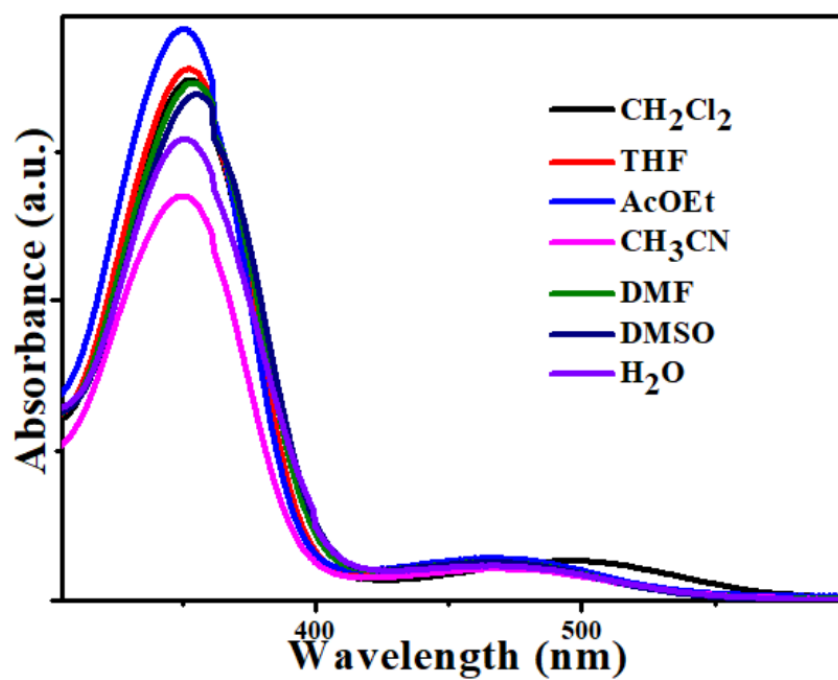

Fig. S34 The UV spectra of P-Orange&Blue-3 in different solution.

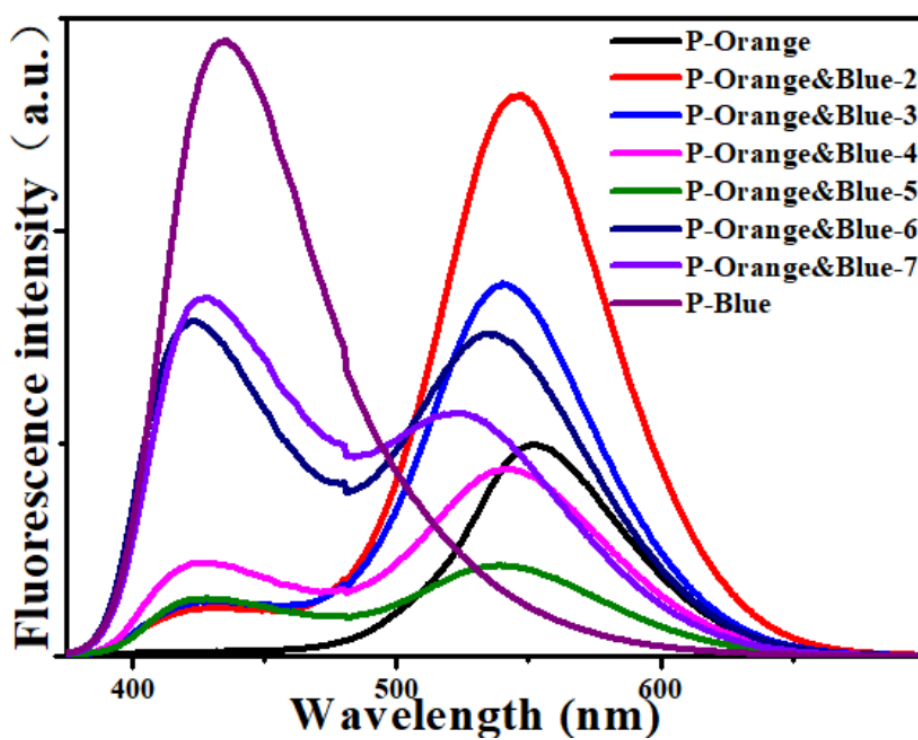

Fig. S35 The fluorescence spectra of P-Orange&Blue in solid state.

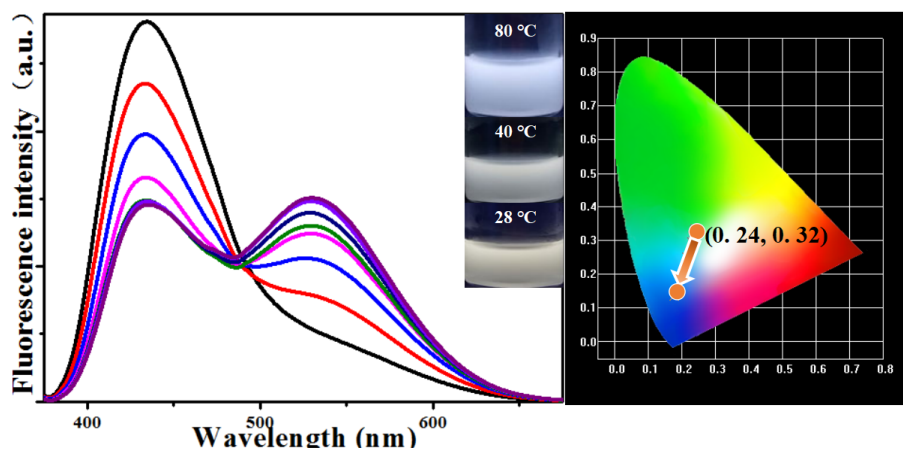

**Fig. S36** The fluorescence spectra and photographs of P-Orange&Blue-3 in aqueous solution at different temperature under UV light (365 nm); The CIE Chromaticity Diagram of P-Orange&Blue-3 in aqueous solution at different temperature.

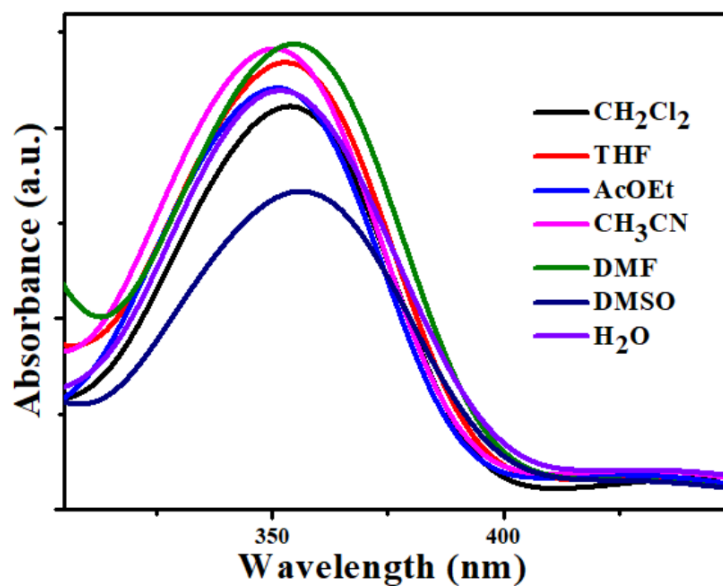

**Fig. S37** The UV spectra of P-Red&Blue-3 in different solution.

## 22. The UV and fluorescence spectra of P-Red&Blue

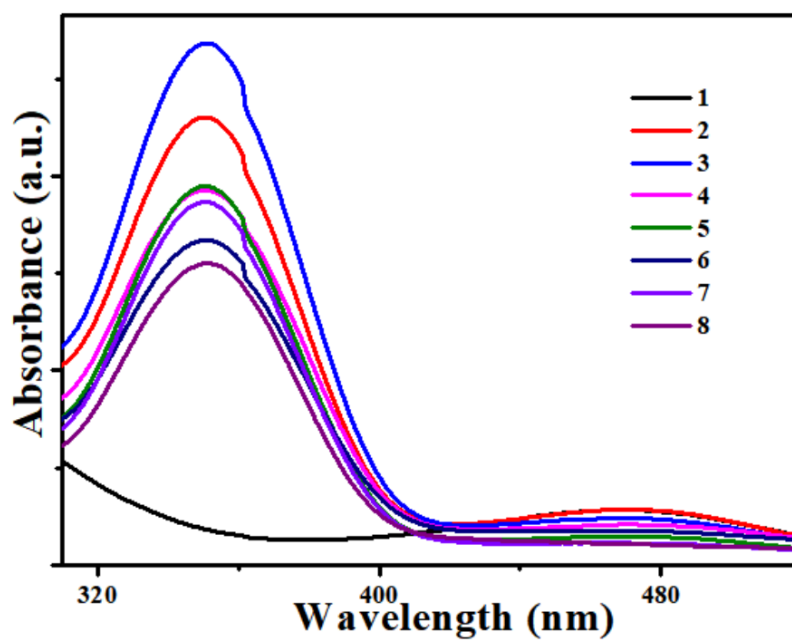

Fig. S38 The UV spectra of P-Red&Blue in aqueous solution.

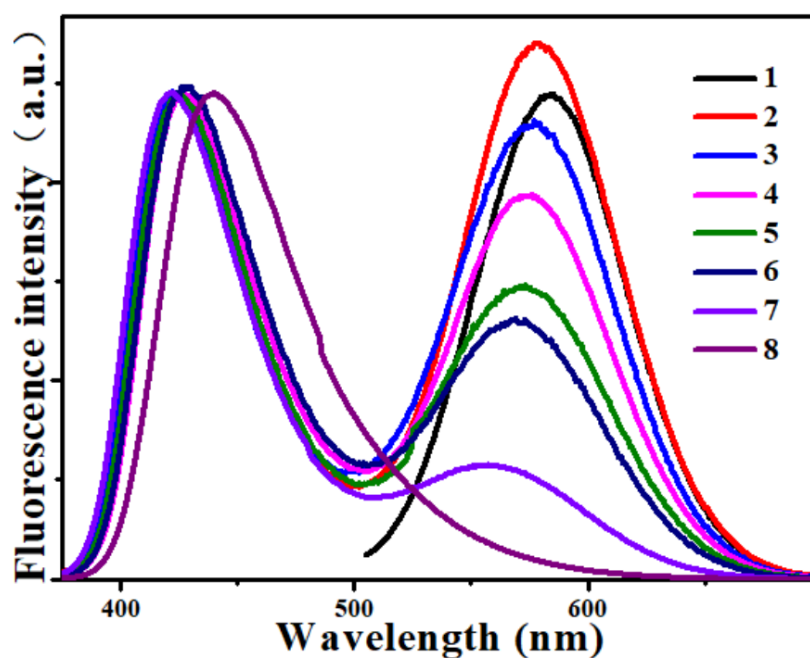

Fig. S39 The fluorescence spectra of P-Red&Blue in solid state.

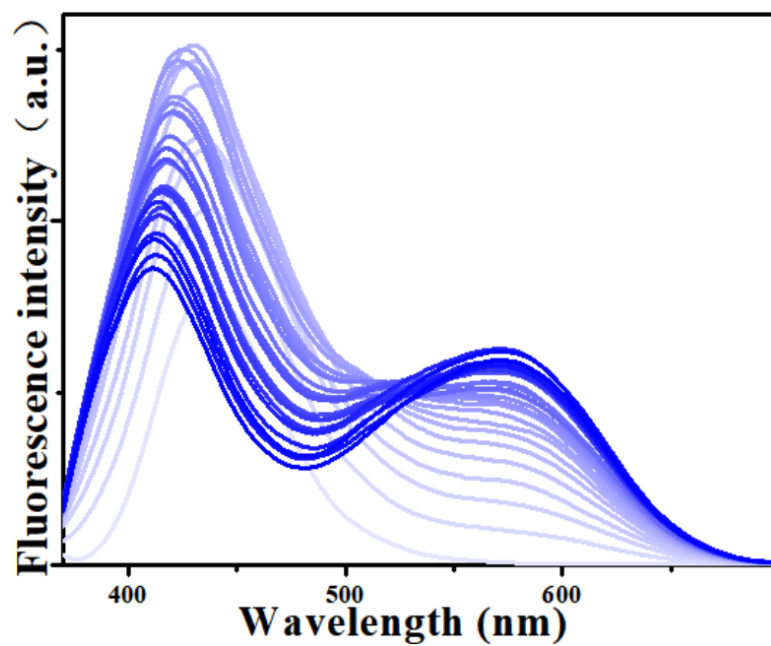

**Fig. S40** The fluorescence spectra of different mass ratios of P-Red and P-Blue in ethyl acetate solution.

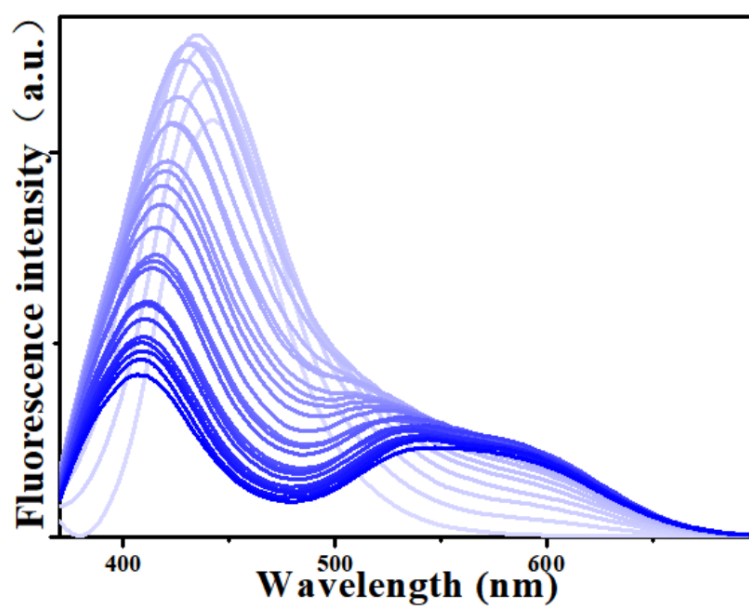

**Fig. S41** The fluorescence spectra of different mass ratios of P-Red and P-Blue in THF solution.

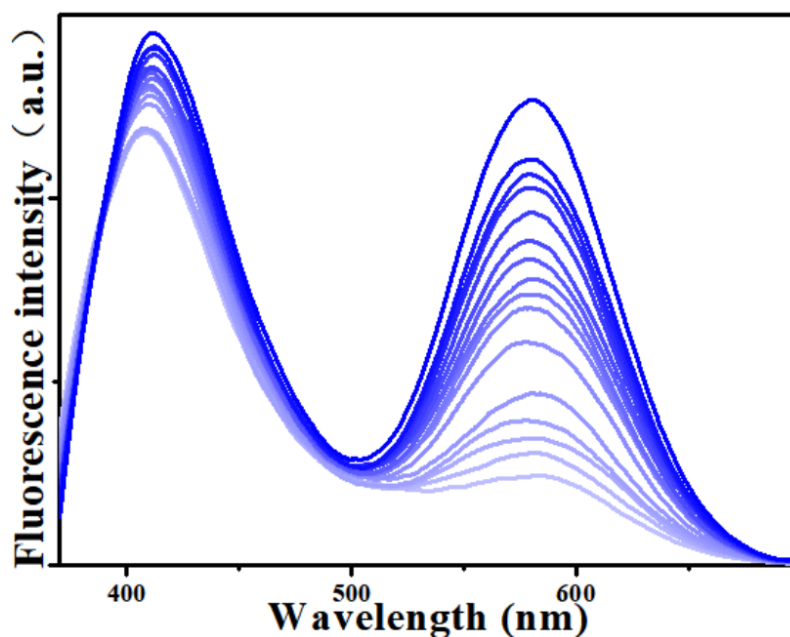

**Fig. S42** The fluorescence spectra of different mass ratios of P-Red and P-Blue in aqueous solution.

### 23. The electrical conductivity of sodium chloride solution

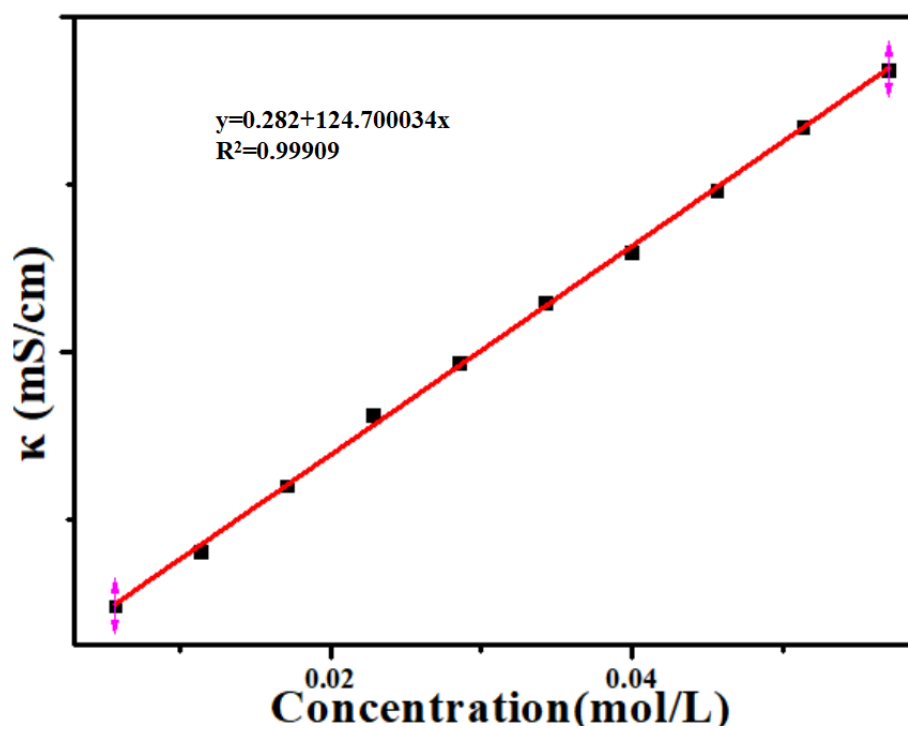

**Fig. S43** The electrical conductivity of a linear fitting curve in sodium chloride solution at different concentrations.

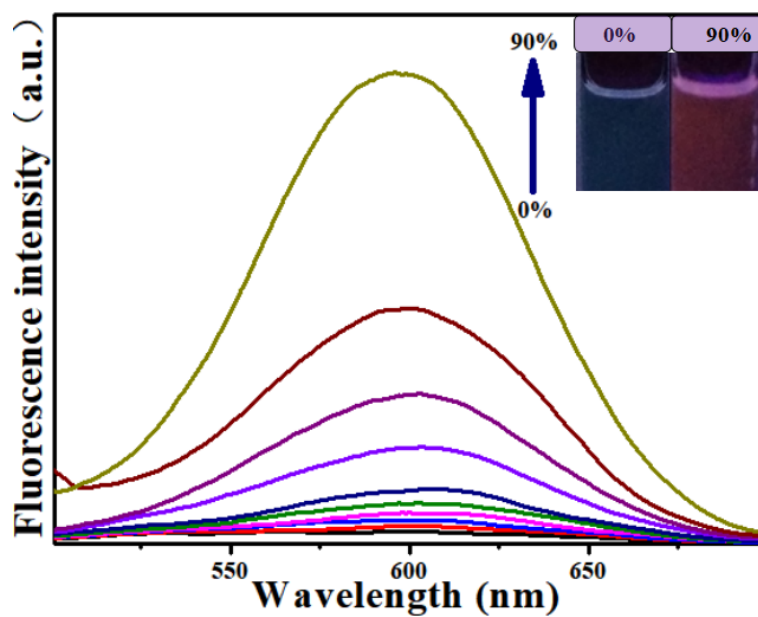

**Fig. S44** The fluorescence spectra and photographs of TPA-Py-CVB

with the  $V_{\text{glycerol}}:V_{\text{MeOH}}$  from 0 to 0.9.

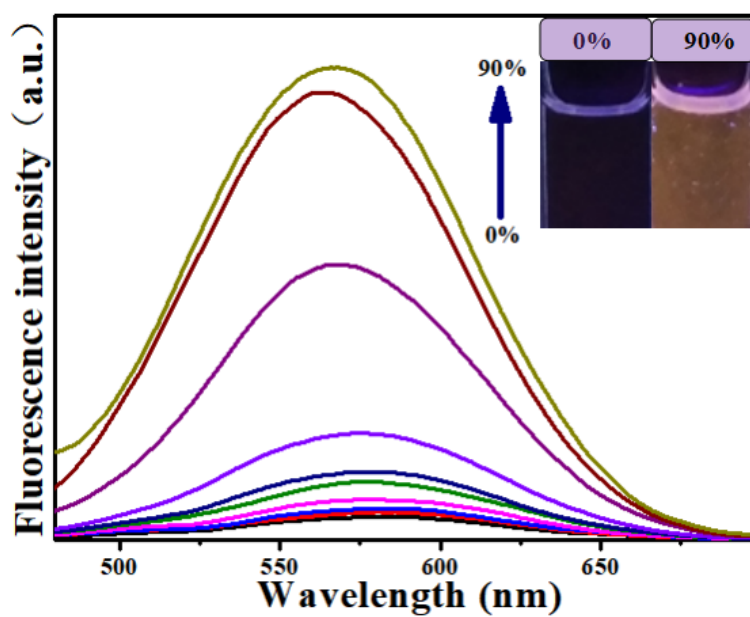

**Fig. S45** The fluorescence spectra and photographs of TPA-VPy-CVB

with the  $V_{\text{glycerol}}:V_{\text{MeOH}}$  from 0 to 0.9.

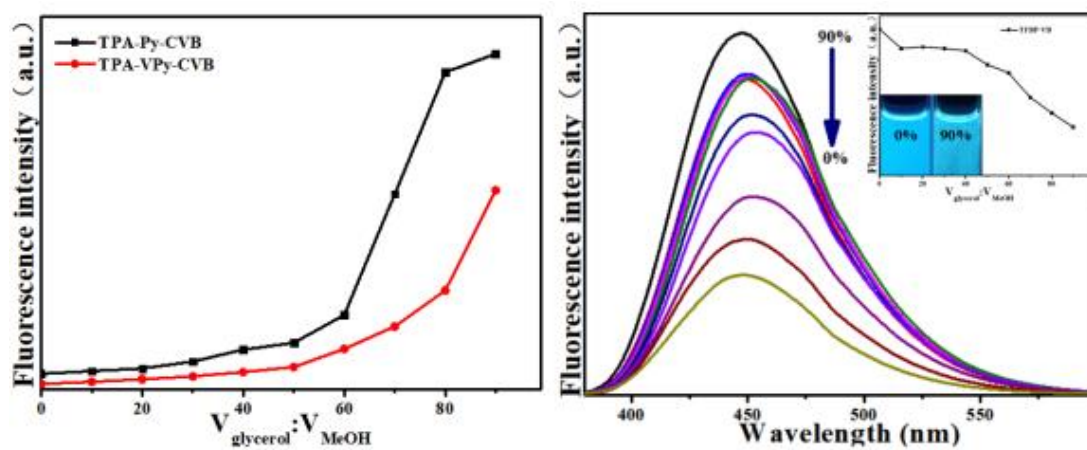

**Fig. S46** Plots of maximum emission intensity of TPA-VPy-CVB and TPA-VPy-CVB with the  $V_{\text{glycerol}}:V_{\text{MeOH}}$  from 0 to 0.9. The Fluorescence Spectra and photographs of TFBP-VB with the  $V_{\text{glycerol}}:V_{\text{MeOH}}$  from 0 to 0.9.
